# Supplementary material
Source: PubMed Central journal article supplement (PMC2757836)
Supplement: 0900919106_ST1_PDF.pdf [file 0900919106_ST1_PDF.pdf]

**Table S1. Level of *Mapk6*<sup>LacZ</sup> expression at E15.5**

| <b>System</b>                | <b>Tissue</b>       | <b>Level</b> |
|------------------------------|---------------------|--------------|
| Head/Neck                    | Teeth               | +++          |
|                              | Nasal cavities      | +++          |
|                              | Submax. gland       | +++          |
| Cardiovascular/<br>Pulmonary | Heart               | +++          |
|                              | Lung                | ++           |
| Nervous                      | Choroid plexus      | ++++         |
|                              | Dorsal root ganglia | +++          |
|                              | Neocortex           | ++           |
|                              | Retina              | +++          |
| Digestive                    | Eosophagus          | +++          |
|                              | Pancreas            | ++           |
|                              | Intestine           | ++           |
| Urogenital                   | Bladder             | +++          |
|                              | Kydney              | +++          |
| Skeletal muscle              | Tongue              | +++          |
